# Supplementary material
Source: publisher figshare collection journal article supplement (https://scielo.figshare.com/articles/dataset/_/6007991)
Supplement: Supplementary file 1 [file Table_1.xls]

## Sheet: Table_1
<b><strong>CNSL (%)</strong></b>	<b><strong>Electrical Conductivity (S.cm<sup>-1</sup>)</strong></b>	<b><strong>T<sub>onset</sub> (&#176;C)</strong></b>	<b><strong>T<sub>max</sub> (&#176;C)</strong></b>	<b><strong>[I<sub>25&#176;</sub>]:[I<sub>19&#176;</sub>]</strong></b>	<b><strong>Solubility of PAni in water (%)</strong></b>
0	2.6 × 10<sup>0</sup>	327	408	6	8
25	8.1 × 10<sup>-1</sup>	350	443	2	94
40	2.3 × 10<sup>-3</sup>	352	447	1	97
