# Supplementary material
Source: publisher figshare collection journal article supplement (https://scielo.figshare.com/articles/dataset/_/6007991)
Supplement: Supplementary file 2 [file Table_2.xls]

## Sheet: Table_2
<b><strong>Reaction time</strong><br><strong>(min)</strong></b>	<b><strong>Temperature</strong><br><strong>(&#176;C)</strong></b>	<b><strong>Average diameter (nm)</strong></b>	<b><strong>Electrical conductivity (S.cm<sup>-1</sup>)</strong></b>
30	25	64 ± 11	8.7 × 10<sup>-4</sup>
60	25	66 ± 12	8.1 × 10<sup>-2</sup>
120	25	74 ± 15	1.3 × 10<sup>-4</sup>
60	0	85 ± 14	1.1 × 10<sup>-4</sup>
60	55	68 ± 13	1.0 × 10<sup>-3</sup>
